# Supplementary material for: Palliative care for children with complex cardiac conditions: survey results
Source: HighWire-hosted journal article supplement (doi:10.1136/archdischild-2020-320866), 2021-07-26
Supplement: archdischild-2020-320866supp002_data_supplement.pdf [file archdischild-2020-320866supp002_data_supplement.pdf]

## Supplementary Data File - 2

**Palliative care for children with complex cardiac conditions: survey results***Raw data*

Q13. Do you think there are barriers to discussing goals of care?

|                                       | <b>Yes</b>    | <b>No</b>     |
|---------------------------------------|---------------|---------------|
| <b>Palliative Care Provider (PCP)</b> | 58/78 (74.4%) | 20/78 (25.6%) |
| <b>Cardiac Care Provider (CCP)</b>    | 73/89 (82%)   | 16/89 (18%)   |

Q15. To what extent do you agree or disagree with the following?

a) Palliative care is primarily about providing care at the end of life

|            | <b>Strongly disagree</b> | <b>Disagree</b> | <b>Agree</b>  | <b>Strongly agree</b> |
|------------|--------------------------|-----------------|---------------|-----------------------|
| <b>PCP</b> | 30/72 (41.7%)            | 37/72 (51.4%)   | 4/72 (5.6%)   | 1/72 (1.4%)           |
| <b>CCP</b> | 18/75 (24%)              | 43/75 (57.3%)   | 14/75 (18.7%) | 0                     |

b) There is no role for palliative care involvement unless the child is expected to die within weeks

|            | <b>Strongly disagree</b> | <b>Disagree</b> | <b>Agree</b> | <b>Strongly agree</b> |
|------------|--------------------------|-----------------|--------------|-----------------------|
| <b>PCP</b> | 61/72 (84.7%)            | 10/72 (13.9%)   | 0            | 1/72 (1.4%)           |
| <b>CCP</b> | 43/75 (57.3%)            | 32/75 (42.7%)   | 0            | 0                     |

c) Palliative care referral would be acceptable to the parents of most of the children with complex cardiac conditions.

|            | <b>Strongly disagree</b> | <b>Disagree</b> | <b>Agree</b>  | <b>Strongly agree</b> |
|------------|--------------------------|-----------------|---------------|-----------------------|
| <b>PCP</b> | 0                        | 21/72 (29.2%)   | 42/72 (58.3%) | 9/72 (12.5%)          |
| <b>CCP</b> | 7/75 (9.3%)              | 40/75 (53.3%)   | 22/75 (29.3%) | 6/75 (8%)             |

d) Parents' hope will be undermined if the option for planning care and treatment in anticipation of a child's potential poor outcome is provided too early

|            | <b>Strongly disagree</b> | <b>Disagree</b> | <b>Agree</b>  | <b>Strongly agree</b> |
|------------|--------------------------|-----------------|---------------|-----------------------|
| <b>PCP</b> | 28/72 (38.9%)            | 41/72 (56.9%)   | 3/72 (4.2%)   | 0                     |
| <b>CCP</b> | 14/75 (18.7%)            | 41/75 (54.7%)   | 19/75 (25.3%) | 1/75 (1.3%)           |

## Supplementary Data File - 2

- e) When a diagnosis with a likely poor outcome is made, parents are routinely referred to palliative care before management for the child has been agreed

|            | <b>Strongly disagree</b> | <b>Disagree</b> | <b>Agree</b> | <b>Strongly agree</b> |
|------------|--------------------------|-----------------|--------------|-----------------------|
| <b>PCP</b> | 21/72 (29.2%)            | 44/72 (61.1%)   | 5/72 (6.9%)  | 2/72 (2.8%)           |
| <b>CCP</b> | 11/75 (14.5%)            | 47/75 (62.7%)   | 15/75 (20%)  | 2/75 (2.7%)           |

- f) When there are conflicting disease specific professional views on the approach to management for a child, a referral to palliative care can be helpful

|            | <b>Strongly disagree</b> | <b>Disagree</b> | <b>Agree</b>  | <b>Strongly agree</b> |
|------------|--------------------------|-----------------|---------------|-----------------------|
| <b>PCP</b> | 1/72 (1.4%)              | 3/72 (4.2%)     | 35/72 (48.6%) | 33/72 (45.8%)         |
| <b>CCP</b> | 2/75 (2.7%)              | 4/75 (5.3%)     | 56/75 (74.7%) | 13/75 (17.3%)         |

- g) Young people are capable of playing a role in decision making

|            | <b>Strongly disagree</b> | <b>Disagree</b> | <b>Agree</b> | <b>Strongly agree</b> |
|------------|--------------------------|-----------------|--------------|-----------------------|
| <b>PCP</b> | 1/72 (1.4%)              | 0               | 18/72 (25%)  | 53/72 (73.6%)         |
| <b>CCP</b> | 0                        | 2/75 (2.7%)     | 36/75 (48%)  | 37/75 (49.3%)         |

- h) A palliative care team can assist in symptom management for a child with a complex cardiac condition.

|            | <b>Strongly disagree</b> | <b>Disagree</b> | <b>Agree</b>  | <b>Strongly agree</b> |
|------------|--------------------------|-----------------|---------------|-----------------------|
| <b>PCP</b> | 1/72 (1.4%)              | 0               | 10/72 (13.9%) | 61/72 (84.7%)         |
| <b>CCP</b> | 1/75 (1.3%)              | 1/75 (1.3%)     | 32/75 (42.7%) | 41/75 (54.7%)         |

Q16. In general, how confident do you feel with the following clinical activities?

- a) Discussing GoC with parents

|            | <b>Very confident</b> | <b>Confident</b> | <b>Not confident</b> | <b>Not at all confident</b> |
|------------|-----------------------|------------------|----------------------|-----------------------------|
| <b>PCP</b> | 36/72 (50%)           | 35/72 (48.6%)    | 1/72 (1.4%)          | 0                           |
| <b>CCP</b> | 23/75 (30.7%)         | 39/75 (52%)      | 12/75 (16%)          | 1/75 (1.5%)                 |

- b) Discussing resuscitation status with parents

|            | <b>Very confident</b> | <b>Confident</b> | <b>Not confident</b> | <b>Not at all confident</b> |
|------------|-----------------------|------------------|----------------------|-----------------------------|
| <b>PCP</b> | 37/72 (51.4%)         | 31/72 (43.1%)    | 3/72 (4.2%)          | 1/72 (1.4%)                 |
| <b>CCP</b> | 16/75 (21.3%)         | 32/75 (42.7%)    | 22/75 (29.3%)        | 5/75 (6.7%)                 |

## Supplementary Data File - 2

## c) Discussing concerns about death and dying with parents

|            | <b>Very confident</b> | <b>Confident</b> | <b>Not confident</b> | <b>Not at all confident</b> |
|------------|-----------------------|------------------|----------------------|-----------------------------|
| <b>PCP</b> | 42/72 (58.3%)         | 29/72 (40.3%)    | 1/72 (1.4%)          | 0                           |
| <b>CCP</b> | 16/75 (21.3%)         | 43/75 (57.3%)    | 13/75 (17.3%)        | 3/75 (4%)                   |

## d) Caring for a child who is deteriorating over hours to days with no realistic chance of survival

|            | <b>Very confident</b> | <b>Confident</b> | <b>Not confident</b> | <b>Not at all confident</b> |
|------------|-----------------------|------------------|----------------------|-----------------------------|
| <b>PCP</b> | 42/72 (58.3%)         | 26/72 (36.1%)    | 3/72 (4.2%)          | 1/72 (1.4%)                 |
| <b>CCP</b> | 25/75 (33.3%)         | 41/75 (54.7%)    | 8/75 (10.7%)         | 1/75 (1.3%)                 |

## e) Prognosticating life expectancy for a child with a complex cardiac condition

|            | <b>Very confident</b> | <b>Confident</b> | <b>Not confident</b> | <b>Not at all confident</b> |
|------------|-----------------------|------------------|----------------------|-----------------------------|
| <b>PCP</b> | 2/72 (2.8%)           | 23/72 (31.9%)    | 34/72 (47.2%)        | 13/72 (18.1%)               |
| <b>CCP</b> | 2/75 (2.7%)           | 17/75 (22.7%)    | 40/75 (53.3%)        | 16/75 (21.3%)               |

## f) Discussing the option of dying at home, in the hospice, or at hospital

|            | <b>Very confident</b> | <b>Confident</b> | <b>Not confident</b> | <b>Not at all confident</b> |
|------------|-----------------------|------------------|----------------------|-----------------------------|
| <b>PCP</b> | 52/72 (72.2%)         | 18/72 (25%)      | 2/72 (2.8%)          | 0                           |
| <b>CCP</b> | 14/75 (18.7%)         | 38/75 (50.7%)    | 20/75 (26.7%)        | 3/75 (4%)                   |

## g) Offering advice in the care of a child with a complex cardiac condition

|            | <b>Very confident</b> | <b>Confident</b> | <b>Not confident</b> | <b>Not at all confident</b> |
|------------|-----------------------|------------------|----------------------|-----------------------------|
| <b>PCP</b> | 15/72 (20.8%)         | 41/72 (56.9%)    | 12/72 (16.7%)        | 4/72 (5.6%)                 |
| <b>CCP</b> |                       |                  |                      |                             |

## Referring to PCT

|            | <b>Very confident</b> | <b>Confident</b> | <b>Not confident</b> | <b>Not at all confident</b> |
|------------|-----------------------|------------------|----------------------|-----------------------------|
| <b>PCP</b> |                       |                  |                      |                             |
| <b>CCP</b> | 29/75 (38.7%)         | 36/75 (48%)      | 7/75 (9.3%)          | 3/75 (4%)                   |

## h) Providing care to a child with a complex cardiac condition during the 'end of life care period'

|  | <b>Very confident</b> | <b>Confident</b> | <b>Not confident</b> | <b>Not at all confident</b> |
|--|-----------------------|------------------|----------------------|-----------------------------|
|  |                       |                  |                      |                             |

## Supplementary Data File - 2

|            |               |               |             |             |
|------------|---------------|---------------|-------------|-------------|
| <b>PCP</b> | 35/72 (48.6%) | 33/72 (45.8%) | 3/72 (4.2%) | 1/72 (1.4%) |
| <b>CCP</b> | 28/75 (37.3%) | 42/75 (56%)   | 3/75 (4%)   | 2/75 (2.7%) |

Q17. Please select if you are confident discussing the following with a young person:

a) Aged 12 years

**GOC**

|            | <b>Yes</b> | <b>No</b> |
|------------|------------|-----------|
| <b>PCP</b> | 64/69      | 5/69      |
| <b>CCP</b> | 52/57      | 5/57      |

**Resus**

|            | <b>Yes</b> | <b>No</b> |
|------------|------------|-----------|
| <b>PCP</b> | 42/68      | 27/69     |
| <b>CCP</b> | 18/57      | 39/57     |

**Death and dying**

|            | <b>Yes</b> | <b>No</b> |
|------------|------------|-----------|
| <b>PCP</b> | 57/69      | 12/69     |
| <b>CCP</b> | 33/57      | 24/57     |

b) Aged 16 years

**GOC**

|            | <b>Yes</b> | <b>No</b> |
|------------|------------|-----------|
| <b>PCP</b> | 68/71      | 3/71      |
| <b>CCP</b> | 61/63      | 2/63      |

**Resus**

|            | <b>Yes</b> | <b>No</b> |
|------------|------------|-----------|
| <b>PCP</b> | 57/71      | 14/71     |
| <b>CCP</b> | 36/63      | 27/63     |

**Death and dying**

|            | <b>Yes</b> | <b>No</b> |
|------------|------------|-----------|
| <b>PCP</b> | 63/71      | 8/71      |
| <b>CCP</b> | 45/63      | 18/63     |

Q18. To what extent do you agree or disagree that a palliative care team could provide valuable support to clinicians caring for children with complex cardiac conditions.

## Supplementary Data File - 2

|            | <b>Strongly disagree</b> | <b>Disagree</b> | <b>Agree</b>  | <b>Strongly agree</b> |
|------------|--------------------------|-----------------|---------------|-----------------------|
| <b>PCP</b> | 3/72 (4.2%)              | 0               | 12/72 (16.7%) | 57/72 (79.2%)         |
| <b>CCP</b> | 1/74 (1.4%)              | 0               | 15/74 (20.3%) | 58/74 (78.4%)         |

Q19. In the last year, how often have you received referrals from clinicians for children with complex cardiac conditions (PC) or how often have you made referrals to the PC team (cardiologists)?

|            | <b>Never</b> | <b>Rarely</b> | <b>Occasionally</b> | <b>Regularly</b> |
|------------|--------------|---------------|---------------------|------------------|
| <b>PCP</b> | 5/72 (6.9%)  | 11/72 (15.3%) | 39/72 (54.2%)       | 17/72 (23.6%)    |
| <b>CCP</b> | 9/74 (12.2%) | 20/74 (27%)   | 27/74 (36.5%)       | 18/75 (24.3%)    |

Q20. Why have children with complex cardiac conditions been referred to you?

| <b>PCP</b>                 |               | <b>CCP</b>                 |               |
|----------------------------|---------------|----------------------------|---------------|
| PPoD Discussions           | 51/72 (70.8%) | PPoD Discussions           | 73/74 (98.6%) |
| Symptom management         | 45/72 (62.5%) | Parental care planning     | 70/74 (94.6%) |
| Parental care planning     | 42/72 (58.3%) | Symptom management         | 67/74 (90.5%) |
| Discuss death/dying issues | 37/72 (51.4%) | Discuss death/dying issues | 64/74 (86.5%) |
| Parental decision making   | 33/72 (45.8%) | Parental decision making   | 58/74 (78.4%) |
| Outcome discussions        | 32/72 (44.4%) | Outcome discussions        | 54/74 (73%)   |
| DNAR discussions           | 32/72 (44.4%) | Interprofessional conflict | 47/74 (63.5%) |

Q21. In general, do you feel that children were referred to palliative care

|            | <b>At the appropriate time</b> | <b>Too early</b> | <b>Too late</b> | <b>N/A</b>  |
|------------|--------------------------------|------------------|-----------------|-------------|
| <b>PCP</b> | 30/72 (41.7%)                  | 0                | 42/72 (58.3%)   | 0           |
| <b>CCP</b> | 21/73 (28.8%)                  | 0                | 46/73 (63%)     | 6/73 (8.2%) |

Q23. Do you think children in the following clinical scenarios should be referred to palliative care?

a) Child where there are no further surgical management options possible

|            | <b>Definitely</b> | <b>Probably</b> | <b>Occasionally</b> | <b>Definitely not</b> |
|------------|-------------------|-----------------|---------------------|-----------------------|
| <b>PCP</b> | 49/63 (77.8%)     | 14/63 (22.2%)   | 0                   | 0                     |
| <b>CCP</b> | 53/66 (80.3%)     | 11/66 (16.7%)   | 2/66 (3%)           | 0                     |

b) Unborn child with an antenatal diagnosis of a single ventricle

|  | <b>Definitely</b> | <b>Probably</b> | <b>Occasionally</b> | <b>Definitely not</b> |
|--|-------------------|-----------------|---------------------|-----------------------|
|--|-------------------|-----------------|---------------------|-----------------------|

## Supplementary Data File - 2

|            |               |               |               |             |
|------------|---------------|---------------|---------------|-------------|
| <b>PCP</b> | 42/63 (66.7%) | 16/63 (25.4%) | 4/63 (6.3%)   | 1/63 (1.6%) |
| <b>CCP</b> | 33/67 (49.3%) | 22/67 (32.8%) | 11/67 (16.4%) | 1/67 (1.5%) |

## c) Child with a VAD insitu

|            | <b>Definitely</b> | <b>Probably</b> | <b>Occasionally</b> | <b>Definitely not</b> |
|------------|-------------------|-----------------|---------------------|-----------------------|
| <b>PCP</b> | 19/63 (30.2%)     | 31/63 (49.2%)   | 10/63 (15.9%)       | 3/63 (4.8%)           |
| <b>CCP</b> | 33/67 (49.3%)     | 19/67 (28.4%)   | 14/67 (20.9%)       | 1/67 (1.5%)           |

## d) Child with a complex cardiac disorder and a major genetic condition

|            | <b>Definitely</b> | <b>Probably</b> | <b>Occasionally</b> | <b>Definitely not</b> |
|------------|-------------------|-----------------|---------------------|-----------------------|
| <b>PCP</b> | 42/63 (66.7%)     | 20/63 (31.7%)   | 1/63 (1.6%)         | 0                     |
| <b>CCP</b> | 32/67 (47.8%)     | 22/67 (32.8%)   | 13/67 (19.4%)       | 0                     |

## e) Child with symptomatic heart failure from myocardial dysfunction

|            | <b>Definitely</b> | <b>Probably</b> | <b>Occasionally</b> | <b>Definitely not</b> |
|------------|-------------------|-----------------|---------------------|-----------------------|
| <b>PCP</b> | 33/63 (52.4%)     | 20/63 (31.7%)   | 10/63 (15.9%)       | 0                     |
| <b>CCP</b> | 24/67 (35.8%)     | 27/67 (40.3%)   | 16/67 (23.9%)       | 0                     |

## f) Child with a complex cardiac condition who requires ongoing ICU admission 30 days after their initial procedure

|            | <b>Definitely</b> | <b>Probably</b> | <b>Occasionally</b> | <b>Definitely not</b> |
|------------|-------------------|-----------------|---------------------|-----------------------|
| <b>PCP</b> | 23/63 (36.5%)     | 28/63 (44.4%)   | 11/63 (17.5%)       | 1/63 (1.6%)           |
| <b>CCP</b> | 28/67 (41.8%)     | 20/67 (29.9%)   | 19/67 (28.4%)       | 0                     |

## g) Child requiring ECMO

|            | <b>Definitely</b> | <b>Probably</b> | <b>Occasionally</b> | <b>Definitely not</b> |
|------------|-------------------|-----------------|---------------------|-----------------------|
| <b>PCP</b> | 16/63 (25.4%)     | 22/63 (34.9%)   | 22/63 (34.9%)       | 3/63 (4.8%)           |
| <b>CCP</b> | 21/67 (31.3%)     | 13/67 (19.4%)   | 31/67 (46.3%)       | 2/67 (3%)             |

## h) Child being planned for ICD

|            | <b>Definitely</b> | <b>Probably</b> | <b>Occasionally</b> | <b>Definitely not</b> |
|------------|-------------------|-----------------|---------------------|-----------------------|
| <b>PCP</b> | 3/63 (4.8%)       | 14/63 (22.2%)   | 39/63 (61.9%)       | 7/63 (11.1%)          |
| <b>CCP</b> | 6/67 (9%)         | 16/67 (23.9%)   | 36/67 (53.7%)       | 9/67 (13.4%)          |

## i) Child being planned for VAD

|            | <b>Definitely</b> | <b>Probably</b> | <b>Occasionally</b> | <b>Definitely not</b> |
|------------|-------------------|-----------------|---------------------|-----------------------|
| <b>PCP</b> | 9/63 (14.3%)      | 28/63 (44.4%)   | 24/63 (38.1%)       | 2/63 (3.2%)           |
| <b>CCP</b> | 22/67 (32.8%)     | 25/67 (37.3%)   | 19/67 (28.4%)       | 1/67 (1.5%)           |

## Supplementary Data File - 2

## j) Newborn child with a single ventricle preceding with surgery

|            | <b>Definitely</b> | <b>Probably</b> | <b>Occasionally</b> | <b>Definitely not</b> |
|------------|-------------------|-----------------|---------------------|-----------------------|
| <b>PCP</b> | 18/63 (28.6%)     | 30/63 (47.6%)   | 12/63 (19%)         | 3/63 (4.8%)           |
| <b>CCP</b> | 29/67 (43.3%)     | 16/67 (23.9%)   | 19/67 (28.4%)       | 3/67 (4.5%)           |

## k) Child listed and awaiting heart transplant

|            | <b>Definitely</b> | <b>Probably</b> | <b>Occasionally</b> | <b>Definitely not</b> |
|------------|-------------------|-----------------|---------------------|-----------------------|
| <b>PCP</b> | 38/63 (60.3%)     | 20/63 (31.7%)   | 5/63 (7.9%)         | 0                     |
| <b>CCP</b> | 38/67 (56.7%)     | 17/67 (25.4%)   | 12/67 (17.9%)       | 0                     |

## l) Where there is a lack of professional consensus within the treating team regarding the plan of care

|            | <b>Definitely</b> | <b>Probably</b> | <b>Occasionally</b> | <b>Definitely not</b> |
|------------|-------------------|-----------------|---------------------|-----------------------|
| <b>PCP</b> | 28/63 (44.4%)     | 25/63 (39.7%)   | 7/63 (11.1%)        | 3/63 (4.8%)           |
| <b>CCP</b> | 23/67 (34.3%)     | 24/67 (35.8%)   | 16/67 (23.9%)       | 4/67 (6%)             |

Q24. In the following clinical scenarios, please select and rank the most useful sources of additional support for the treating clinician

a) Resuscitation  
COLLEAGUE

|            | <b>1st</b>    | <b>2nd</b>  | <b>3rd</b>    | <b>N/A</b>  |
|------------|---------------|-------------|---------------|-------------|
| <b>PCP</b> | 34/63 (54%)   | 17/63 (27%) | 11/63 (17.5%) | 1/63 (1.6%) |
| <b>CCP</b> | 62/67 (92.5%) | 1/67 (1.5%) | 2/67 (3%)     | 2/67 (3%)   |

## CLINICAL ETHICS PANEL

|            | <b>1st</b>    | <b>2nd</b>    | <b>3rd</b>    | <b>N/A</b>   |
|------------|---------------|---------------|---------------|--------------|
| <b>PCP</b> | 10/63 (15.9%) | 14/63 (22.2%) | 37/63 (58.7%) | 2/63 (3.2%)  |
| <b>CCP</b> | 2/67 (3%)     | 10/67 (14.9%) | 47/67 (70.1%) | 8/67 (11.9%) |

## PCT

|            | <b>1st</b>    | <b>2nd</b>    | <b>3rd</b>    | <b>N/A</b>   |
|------------|---------------|---------------|---------------|--------------|
| <b>PCP</b> | 22/63 (34.9%) | 31/63 (49.2%) | 10/63 (15.9%) | 0            |
| <b>CCP</b> | 5/67 (7.5%)   | 51/67 (76.1%) | 4/67 (6%)     | 7/67 (10.4%) |

## b) Surgery

## COLLEAGUE

|            | <b>1st</b>    | <b>2nd</b>   | <b>3rd</b>  | <b>N/A</b> |
|------------|---------------|--------------|-------------|------------|
| <b>PCP</b> | 44/63 (69.8%) | 7/63 (11.1%) | 12/63 (19%) | 0          |
| <b>CCP</b> | 61/67 (91%)   | 2/67 (3%)    | 2/67 (3%)   | 2/67 (3%)  |

## Supplementary Data File - 2

## CLINICAL ETHICS PANEL

|            | 1st          | 2nd           | 3rd           | N/A          |
|------------|--------------|---------------|---------------|--------------|
| <b>PCP</b> | 9/63 (14.3%) | 12/63 (19%)   | 40/63 (63.5%) | 2/63 (3.2%)  |
| <b>CCP</b> | 3/67 (4.5%)  | 12/67 (17.9%) | 44/67 (65.7%) | 8/67 (11.9%) |

## PCT

|            | 1st           | 2nd           | 3rd          | N/A         |
|------------|---------------|---------------|--------------|-------------|
| <b>PCP</b> | 14/63 (22.2%) | 40/63 (63.5%) | 8/63 (12.7%) | 1/63 (1.6%) |
| <b>CCP</b> | 7/67 (10.4%)  | 46/67 (68.7%) | 9/67 (13.4%) | 5/67 (7.5%) |

## c) Tracheostomy

## COLLEAGUE

|            | 1st           | 2nd           | 3rd           | N/A       |
|------------|---------------|---------------|---------------|-----------|
| <b>PCP</b> | 36/63 (57.1%) | 11/63 (17.5%) | 16/63 (25.4%) | 0         |
| <b>CCP</b> | 55/67 (82.1%) | 9/67 (13.4%)  | 1/67 (1.5%)   | 2/67 (3%) |

## CLINICAL ETHICS PANEL

|            | 1st           | 2nd           | 3rd           | N/A          |
|------------|---------------|---------------|---------------|--------------|
| <b>PCP</b> | 10/63 (15.9%) | 19/63 (30.2%) | 28/63 (44.4%) | 6/63 (9.5%)  |
| <b>CCP</b> | 6/67 (9%)     | 8/67 (11.9%)  | 45/67 (67.2%) | 8/67 (11.9%) |

## PCT

|            | 1st           | 2nd           | 3rd           | N/A          |
|------------|---------------|---------------|---------------|--------------|
| <b>PCP</b> | 19/63 (30.2%) | 33/63 (52.4%) | 10/63 (15.9%) | 1/63 (1.6%)  |
| <b>CCP</b> | 9/67 (13.4%)  | 43/67 (64.2%) | 7/67 (10.4%)  | 8/37 (11.9%) |

## d) Nutrition/Hydration challenge

## COLLEAGUE

|            | 1st           | 2nd           | 3rd           | N/A         |
|------------|---------------|---------------|---------------|-------------|
| <b>PCP</b> | 36/63 (57.1%) | 16/63 (25.4%) | 10/63 (15.9%) | 1/63 (1.6%) |
| <b>CCP</b> | 61/67 (91%)   | 3/67 (4.5%)   | 0             | 3/67 (4.5%) |

## CLINICAL ETHICS PANEL

|            | 1st         | 2nd           | 3rd           | N/A           |
|------------|-------------|---------------|---------------|---------------|
| <b>PCP</b> | 12/63 (19%) | 22/63 (34.9%) | 25/63 (39.7%) | 4/63 (6.3%)   |
| <b>CCP</b> | 3/37 (4.5%) | 18/67 (26.9%) | 25/67 (37.3%) | 21/67 (31.3%) |



## Supplementary Data File - 2

PCT

|            | <b>1st</b>    | <b>2nd</b>    | <b>3rd</b>    | <b>N/A</b>    |
|------------|---------------|---------------|---------------|---------------|
| <b>PCP</b> | 18/63 (28.6%) | 23/63 (36.5%) | 16/63 (25.4%) | 6/63 (9.5%)   |
| <b>CCP</b> | 5/67 (7.5%)   | 28/67 (41.8%) | 11/67 (16.4%) | 23/67 (34.3%) |
